# Supplementary material for: Prevalence of Type 2 Diabetes and Its Association with Added Sugar Intake in Citizens and Refugees Aged 40 or Older in the Gaza Strip, Palestine
Source: Int J Environ Res Public Health. 2020 Nov 19;17(22):8594. doi: 10.3390/ijerph17228594 (PMC7699327; doi:10.3390/ijerph17228594)
Supplement: Supplementary file 1 [file ijerph-17-08594-s001.pdf]

**Table S1.** Characteristics of study participants according to population; (Refugees and Citizens). <sup>a</sup>

| Variable                                   | All<br><i>n</i> = 1000 | Refugees<br><i>n</i> = 422 | Citizens<br><i>n</i> = 578 | <i>p</i> -Value |
|--------------------------------------------|------------------------|----------------------------|----------------------------|-----------------|
| Age, years                                 | 59.2 (7.5)             | 59.4 (7.6)                 | 58.9 (7.5)                 | 0.282           |
| Women                                      | 468 (46.8%)            | 197 (46.7%)                | 271 (46.8%)                | 0.949           |
| Study regions                              |                        |                            |                            | 0.698           |
| North                                      | 220 (22.0%)            | 92 (21.8%)                 | 128 (22.2%)                |                 |
| Gaza                                       | 122 (12.2%)            | 47 (11.1%)                 | 75 (12.9%)                 |                 |
| Midzone                                    | 214 (21.4%)            | 96 (22.8%)                 | 118 (20.4%)                |                 |
| Khan Younis                                | 223 (22.3%)            | 89 (21.1%)                 | 134 (23.2%)                |                 |
| Rafah                                      | 221 (22.1%)            | 98 (23.2%)                 | 123 (21.3%)                |                 |
| Family size                                | 6.9 (1.5)              | 6.9 (1.5)                  | 6.9 (1.5)                  | 0.323           |
| Married                                    | 844 (84.4%)            | 359 (85.1%)                | 485 (83.9%)                | 0.849           |
| Education                                  |                        |                            |                            | 0.658           |
| Low                                        | 451 (45.1%)            | 186 (44.1%)                | 265 (45.9%)                |                 |
| Moderate                                   | 295 (29.5%)            | 131 (31.0%)                | 164 (28.4%)                |                 |
| High                                       | 254 (25.4%)            | 105 (24.9%)                | 149 (25.7%)                |                 |
| Employed                                   | 117 (11.7%)            | 52 (12.3%)                 | 65 (11.3%)                 | 0.601           |
| Household income (NIS)                     |                        |                            |                            | 0.439           |
| <500                                       | 51 (5.1%)              | 25 (5.9%)                  | 26 (4.5%)                  |                 |
| 500-<1000                                  | 41 (4.1%)              | 20 (4.7%)                  | 21 (3.6%)                  |                 |
| 1000-1500                                  | 48 (4.8%)              | 18 (4.3%)                  | 30 (5.2%)                  |                 |
| >1500                                      | 6 (0.6%)               | 1 (0.3%)                   | 5 (0.9%)                   |                 |
| No constant income                         | 854 (85.4%)            | 358 (84.8%)                | 496 (85.8%)                |                 |
| Having family history of NCDs <sup>b</sup> | 468 (46.8%)            | 192 (45.5%)                | 276 (47.8%)                | 0.481           |
| Type 2 Diabetes                            | 452 (45.2%)            | 193 (45.7%)                | 259 (44.8%)                | 0.546           |
| Physical activity                          |                        |                            |                            | 0.717           |
| Low                                        | 654 (65.4%)            | 270 (64.0%)                | 384 (66.4%)                |                 |
| Moderate                                   | 247 (24.7%)            | 108 (25.6%)                | 139 (24.1%)                |                 |
| High                                       | 99 (9.9%)              | 44 (10.4%)                 | 55 (9.5%)                  |                 |
| T2D Medications (For T2D patients)         |                        |                            |                            | 0.633           |
| Oral hypoglycaemic drugs                   | 225 (49.7%)            | 101 (52.3%)                | 124 (47.8%)                |                 |
| Insulin                                    | 171 (37.8%)            | 71 (36.7%)                 | 100 (38.6%)                |                 |
| Both                                       | 56 (12.4%)             | 21 (10.9%)                 | 35 (13.5%)                 |                 |
| Current cigarette's smoking                | 446 (44.6%)            | 194 (45.9%)                | 252 (43.6%)                | 0.456           |
| BMI, kg/m <sup>2</sup>                     | 28.2 (3.7)             | 28.3 (3.6)                 | 28.1 (3.7)                 | 0.902           |
| Waist circumference, cm                    | 105.0 (14.7)           | 106.3 (14.8)               | 104.0 (14.6)               | 0.797           |
| Fasting glucose, mmol/l                    | 9.4 (4.7)              | 9.6 (4.7)                  | 9.4 (4.6)                  | 0.638           |
| HbA <sub>1c</sub> , mmol/mol               | 48.4 (18.8)            | 48.2 (14.8)                | 48.6 (18.9)                | 0.327           |
| HbA <sub>1c</sub> , %                      | 6.6 (1.7)              | 6.5 (1.6)                  | 6.6 (1.8)                  | 0.352           |
| Total cholesterol, mmol/l                  | 5.7 (1.6)              | 5.7 (1.6)                  | 217.9 (5.6)                | 0.456           |
| Triglycerides, mmol/l                      | 2.1 (0.8)              | 2.1 (0.8)                  | 2.1 (0.8)                  | 0.570           |
| HDL, mmol/l                                | 1.1 (0.2)              | 1.1 (0.2)                  | 1.1 (0.2)                  | 0.347           |
| LDL, mmol/l                                | 4.4 (1.3)              | 4.4 (1.3)                  | 4.4 (1.3)                  | 0.572           |
| Systolic blood pressure, mmHg              | 137.4 (21.4)           | 138.3 (22.4)               | 136.7 (20.6)               | 0.064           |
| Diastolic blood pressure, mmHg             | 85.6 (7.2)             | 86.0 (7.6)                 | 85.4 (6.8)                 | 0.015           |
| Added sugar intake, g/day                  | 60.6 (22.4)            | 61.4 (23.1)                | 60.0 (21.9)                | 0.337           |
| Fruits consumption, g/day                  | 163.2 (49.3)           | 164.2 (49.4)               | 162.4 (49.2)               | 0.558           |
| Vegetable consumption, g/day               | 282.3 (59.6)           | 281.0 (60.2)               | 283.1 (59.4)               | 0.585           |

<sup>a</sup> Data are presented as mean (SD) for continuous measures and *n* (%) for categorical measures; <sup>b</sup> NCDs: non-communicable diseases such as stroke, cardiovascular disease, cancer, diabetes mellitus, and hypertension for father and mother together; NIS, New Israeli Shekel; BMI, Body mass index; HbA<sub>1c</sub>, Haemoglobin A<sub>1c</sub>; HDL, High-density lipoprotein; LDL, Low-density lipoprotein; T2D, type 2 diabetes.

**Table S2.** Adjusted odds ratio (95 % CI) of the T2D for the sample population participants by average daily added sugar intake ( $n = 1000$ ).

| Added sugar intake level<br>g/day | No. of participants<br>$n$ (%) | Model 1          | Model 2          | Model 3          | Model 4          |
|-----------------------------------|--------------------------------|------------------|------------------|------------------|------------------|
| <50.0 g/day                       | 216 (21.6%)                    | 1.00             | 1.00             | 1.00             | 1.00             |
| 50.0–66.0 g/day                   | 343 (34.3%)                    | 1.26 (0.89–1.78) | 1.28 (0.89–1.82) | 1.31 (0.92–1.86) | 1.28 (0.89–1.81) |
| 67.0–99.0 g/day                   | 361 (36.1%)                    | 0.96 (0.68–1.37) | 1.00 (0.69–1.44) | 1.02 (0.71–1.47) | 1.00 (0.69–1.42) |
| ≥100.0 g/day                      | 80 (8.0%)                      | 1.42 (0.84–2.39) | 1.50 (0.88–2.58) | 1.54 (0.89–2.64) | 1.55 (0.89–2.68) |
| $p$ for trend                     |                                | 0.556            | 0.611            | 0.324            | 0.338            |

Model 1, Adjusted for age, sex, population, region, income, education, and smoking; Model 2, Model 1 plus physical activity and body mass index; Model 3, Model 2 plus fruits and vegetable intake; Model 4, Model 3 plus hypertension and lipid profile (total cholesterol, triglycerides, HDL, and LDL).

**Table S3.** Adjusted OR (95 % CI) of undiagnosed T2D by added sugar intake level after including HbA<sub>1c</sub> in the definition of outcome ( $n = 548$ ).

| Added sugar intake level<br>g/day | No. of participants<br>$n$ (%) | Model 1          | Model 2          | Model 3          | Model 4          |
|-----------------------------------|--------------------------------|------------------|------------------|------------------|------------------|
| <50.0 g/day                       | 126 (23.0%)                    | 1.00             | 1.00             | 1.00             | 1.00             |
| 50.0–66.0 g/day                   | 181 (33.0%)                    | 2.21 (1.26–3.89) | 2.09 (1.18–3.69) | 2.07 (1.17–3.68) | 2.05 (1.16–3.65) |
| 67.0–99.0 g/day                   | 201 (36.7%)                    | 1.76 (0.99–3.12) | 1.56 (0.87–2.79) | 1.56 (0.87–2.79) | 1.54 (0.86–2.76) |
| ≥100.0 g/day                      | 40 (7.3%)                      | 3.65 (1.59–8.37) | 2.91 (1.25–6.81) | 2.86 (1.22–6.71) | 2.98 (1.27–6.98) |
| $p$ for trend                     | <0.001                         | <0.001           | <0.001           | <0.001           |                  |

Model 1, Adjusted for age, sex, population, region, income, education, and smoking; Model 2, Model 1 plus physical activity and body mass index; Model 3, Model 2 plus fruits and vegetable intake; Model 4, Model 3 plus hypertension and lipid profile (total cholesterol, triglycerides, HDL, and LDL).

**Table S4.** Adjusted OR (95 % CI) of undiagnosed T2D by added sugar intake level after including HbA<sub>1c</sub> in the definition of outcome (*n* = 548).

| Variable<br>N (%)       | <50.0 g/day<br>OR (95% CI)<br><i>n</i> (%) | 50.0–66.0 g/day<br>OR (95 % CI)<br><i>n</i> (%) | ≥67.0 g/day<br>OR (95 % CI)<br><i>n</i> (%) | <i>p</i> -Value trend | <i>p</i> -Value interaction |
|-------------------------|--------------------------------------------|-------------------------------------------------|---------------------------------------------|-----------------------|-----------------------------|
| Sex                     |                                            |                                                 |                                             |                       | 0.188                       |
| Men                     | 1.00                                       | 1.58 (0.70–3.58)                                | 1.91 (0.88–4.14)                            | 0.082                 |                             |
| 287 (52.4%)             | 64 (22.3%)                                 | 89 (13.0%)                                      | 134 (46.7%)                                 |                       |                             |
| Women                   | 1.00                                       | 2.59 (1.16–5.75)                                | 1.36 (0.61–3.01)                            | 0.942                 |                             |
| 261 (47.6%)             | 62 (23.8%)                                 | 92 (35.2%)                                      | 107 (41.0%)                                 |                       |                             |
| Age (Median)            |                                            |                                                 |                                             |                       | 0.372                       |
| <59 years               | 1.00                                       | 1.74 (0.73–4.11)                                | 1.61 (0.72–3.63)                            | 0.071                 |                             |
| 262 (47.8%)             | 72 (27.5%)                                 | 77 (29.4%)                                      | 113 (43.1%)                                 |                       |                             |
| ≥59 years               | 1.00                                       | 1.52 (0.67–3.43)                                | 1.07 (0.47–2.43)                            | 0.686                 |                             |
| 286 (52.2%)             | 54 (18.9%)                                 | 104 (36.4%)                                     | 128 (44.7%)                                 |                       |                             |
| BMI                     |                                            |                                                 |                                             |                       | 0.001                       |
| <26.7 kg/m <sup>2</sup> | 1.00                                       | 2.35 (0.92–6.02)                                | 2.19 (0.86–5.51)                            | 0.460                 |                             |
| 271 (49.4%)             | 64 (23.6%)                                 | 94 (34.7%)                                      | 113 (41.7%)                                 |                       |                             |
| ≥26.7 kg/m <sup>2</sup> | 1.00                                       | 7.06 (2.77–18.01)                               | 5.02 (2.03–12.42)                           | 0.024                 |                             |
| 277 (50.6%)             | 62 (22.4%)                                 | 87 (31.5%)                                      | 128 (46.2%)                                 |                       |                             |
| Population              |                                            |                                                 |                                             |                       | 0.035                       |
| Refugees                | 1.00                                       | 5.85 (1.86–18.39)                               | 5.32 (1.70–16.63)                           | 0.028                 |                             |
| 224 (40.9%)             | 46 (20.5%)                                 | 79 (35.3%)                                      | 99 (44.2%)                                  |                       |                             |
| Citizens                | 1.00                                       | 5.49 (1.78–16.95)                               | 4.12 (1.36–12.45)                           | 0.849                 |                             |
| 324 (59.1%)             | 80 (24.7%)                                 | 102 (31.5%)                                     | 142 (43.8%)                                 |                       |                             |

Variables adjusted for age, sex, population, region, income, education, smoking, physical activity, body mass index, fruits and vegetable intake, hypertension, and lipid profile (total cholesterol, triglycerides, HDL, and LDL).

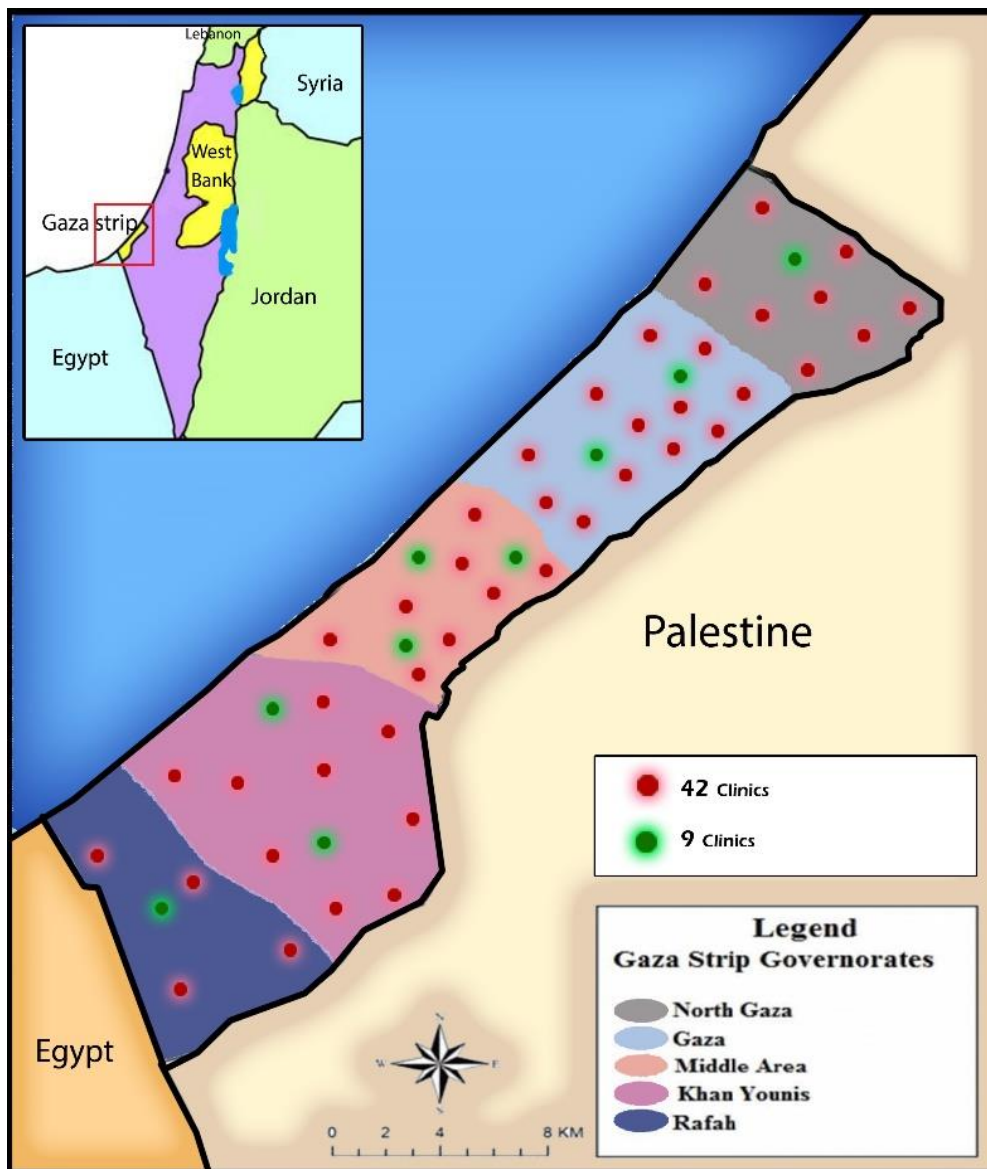

**Figure 1.** The selected Primary Healthcare Centers (PHCs) across the Gaza Strip governorates (designed by the author).
